# Supplementary material for: Probing the microstructural changes in Li-rich layered oxides induced by over-lithiation
Source: Royal Society of Chemistry journal article supplement (doi:10.1039/d5cc06461a), 2025-12-02
Supplement: d5cc06461a1.pdf [file d5cc06461a1.pdf]

## Supporting Information

### Probing the Microstructural Changes in Li-Rich Layered Oxides Induced by Over-lithiation

Yifan Wang,<sup>a</sup> Xiaoxia Yang,<sup>\*b,c</sup> Xinyue Zhai<sup>b</sup>, Qin Wang<sup>b</sup>, Jianqiang Hu,<sup>\*a</sup>  
and Weibo Hua<sup>\*b</sup>

a. Key Lab of Fuel Cell Technology of Guangdong Province, School of Chemistry and Chemical Engineering, South China University of Technology, Guangzhou 510641, Guangdong, China. E-mail: jqhusc@scut.edu.cn.

b. School of Chemical Engineering and Technology, State Key Laboratory of Electrical Insulation and Power Equipment, Xi'an Jiaotong University, No. 28 West Xianning Road, Xi'an 710049, China. E-mail: weibo.hua@xjtu.edu.cn.

c. College School of Energy and Materials Engineering, Taiyuan University of Science and Technology, No. 66 Waliu Road, Taiyuan 030024, China. E-mail: yangxiaoxia1@tyust.edu.cn.

## **S1 Experimental Section**

### **S1.1 Material Preparation**

The lithium-rich manganese-based cathode material  $\text{Li}_{1.2}\text{Mn}_{0.6}\text{Ni}_{0.2}\text{O}_2$  (LLNMO) was synthesized by high-temperature solid-state method. The precursor of  $\text{Li}_{1.2}\text{Mn}_{0.6}\text{Ni}_{0.2}\text{O}_2$  was prepared using hydroxide co-precipitation method. A 2 M aqueous solution containing  $\text{NiSO}_4 \cdot 6\text{H}_2\text{O}$  and  $\text{MnSO}_4 \cdot \text{H}_2\text{O}$  with a ratio of 1:3 was continuously fed into the reactor. Concurrently, 4 M NaOH precipitation solution and controlled volumes of  $\text{NH}_3 \cdot \text{H}_2\text{O}$  solution (chelating agent) were pumped into the reactor. Throughout the coprecipitation process, the pH value ( $11.0 \pm 0.2$ ), temperature ( $52 \pm 2$  °C), and stirring speed (600 rpm) were rigorously maintained. The entire reaction was performed under nitrogen atmosphere. The resulting precipitate was filtered, washed thoroughly, and dried at 80 °C for 12 h to obtain precursor powders. The prepared precursor was then homogeneously mixed with stoichiometric  $\text{LiOH} \cdot \text{H}_2\text{O}$  (the molar ratio of Li:TM=1.05:1). Final  $\text{Li}_{1.2}\text{Mn}_{0.6}\text{Ni}_{0.2}\text{O}_2$  samples were synthesized by pre-calcination at 500 °C for 6 h followed by calcination at 900 °C for 12 h in air.

### **S1.2 Electrochemical Characterization**

The electrochemical performance of LLNMO cathode was evaluated via galvanostatic cycling in CR2032 coin-type half-cells. The active LLNMO material, super P conductive agent and polyvinylidene fluoride (PVDF) were mixed at a mass ratio of 80 wt% :10 wt% :10 wt%. The slurry was prepared using NMP as the solvent and then coated on the Al foil followed by drying in a vacuum oven at 80 °C overnight. The cathode was cut into 12 mm diameter discs with the active material mass loading of approximately 3-4 mg  $\text{cm}^{-2}$ . Lithium metal was used as the anode, Celgard 2325 film as the separator,  $\text{LiPF}_6$  in ethylene carbonate (EC): dimethyl carbonate (DMC) 1:1 (v/v) (LP30) as the electrolyte. Cell assembly was performed in an argon-filled glove box ( $\text{O}_2/\text{H}_2\text{O} < 0.1$  ppm). Galvanostatic charge-discharge tests were conducted at a Neware potentiostat, with a current density of 28 mA  $\text{g}^{-1}$  between 2.0 - 4.8 V and 1.0 - 4.8 V (vs.  $\text{Li}^+/\text{Li}$ ) at 25 °C, respectively.

### **S1.3 Synchrotron X-ray Diffraction (sXRD)**

To investigate the crystal structure evolutions of LLNMO cathode, *in situ* sXRD

experiment was performed at the beamline P02.1 of PETRA-III using synchrotron radiation with an energy of 60 keV ( $\lambda = 0.2072 \text{ \AA}$ ) at ALBA synchrotron, Barcelona, Spain. The exposure time is 60 s per sXRD pattern. *In situ* electrochemical cells featuring beryllium X-ray transmission windows were employed to maintain electrochemical stability while enabling X-ray penetration. Two-dimensional (2D) diffraction patterns were acquired utilizing a 2D flat-panel detector (PerkinElmer amorphous-silicon detector) at the P02.1 beamline, with the distance between the sample and the detector maintained at approximately 1600 mm. Subsequently, the acquired 2D diffraction images were converted into one-dimensional (1D) diffraction patterns via the X-ray image processing software Fit2D. The sXRD data were collected at 0.1 C under over-discharge (1.0-4.8 V) condition. The crystallographic parameters and microstrain were obtained by the Rietveld method using the FULLPROF program.

#### **S1.4 Material characterization**

The micromorphology and elemental distribution of the sample were examined using a scanning electron microscope equipped with energy-dispersive X-ray spectroscopy (SEM-EDS, MAIA3 LMH). Additionally, the quantitative chemical composition of LLNMO cathode was determined by inductively coupled plasma mass spectrometry (NexION 350D ICP-MS).

## S2 Additional results

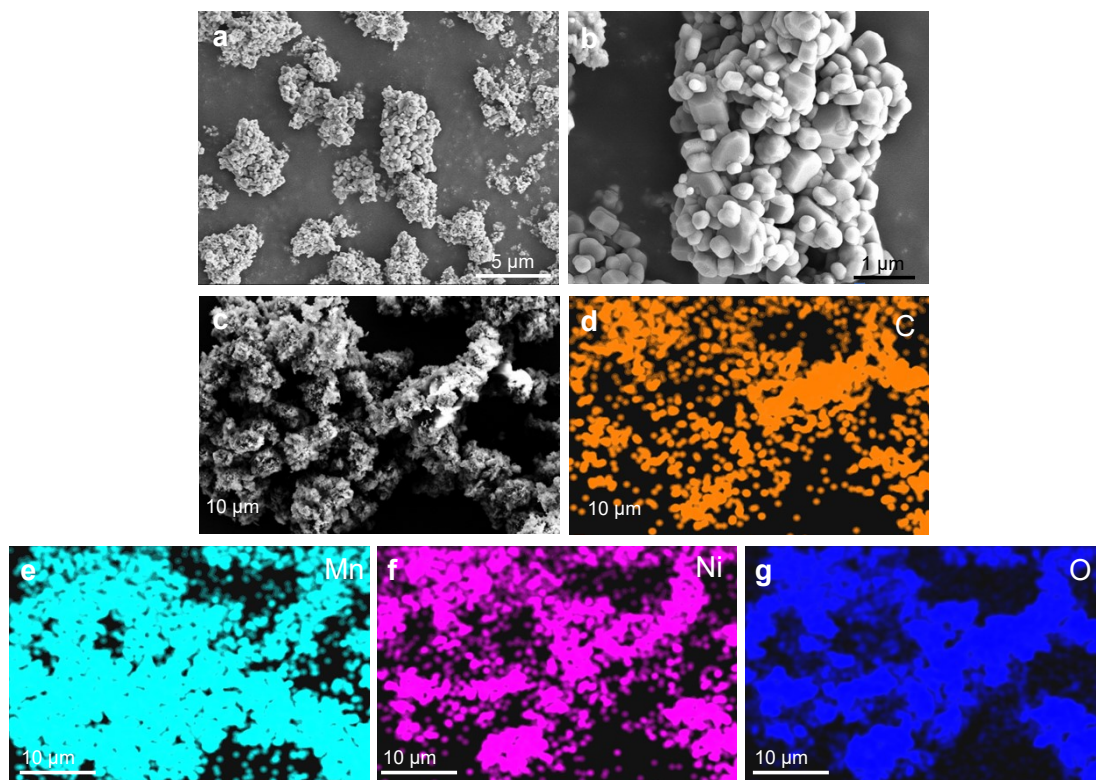

**Figure S1.** SEM and EDS mapping images of LLNMO.

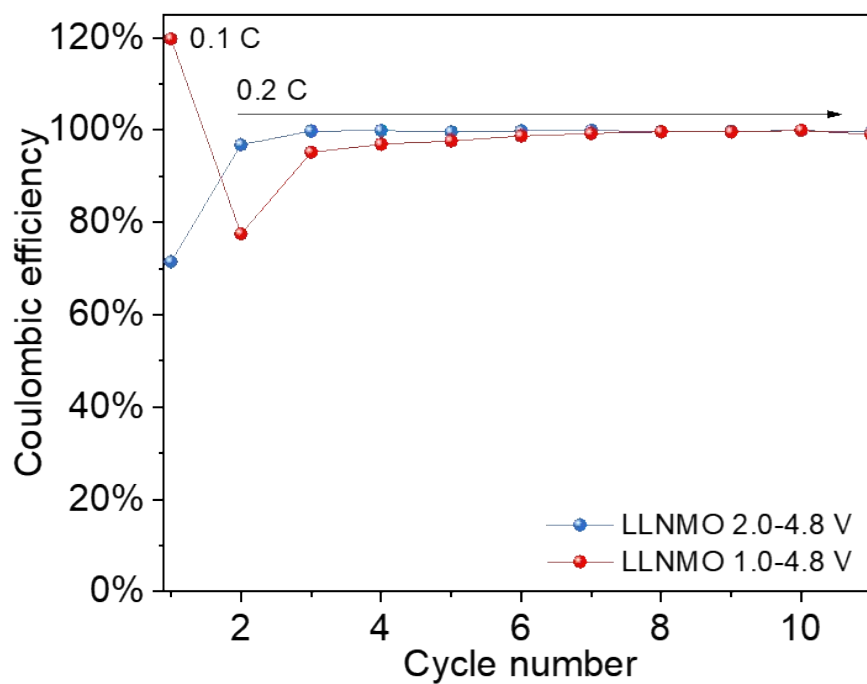

**Figure S2.** Coulombic efficiencies of LLNMO cathode within the voltage ranges of 2.0-4.8 and 1.0-4.8 V, respectively.

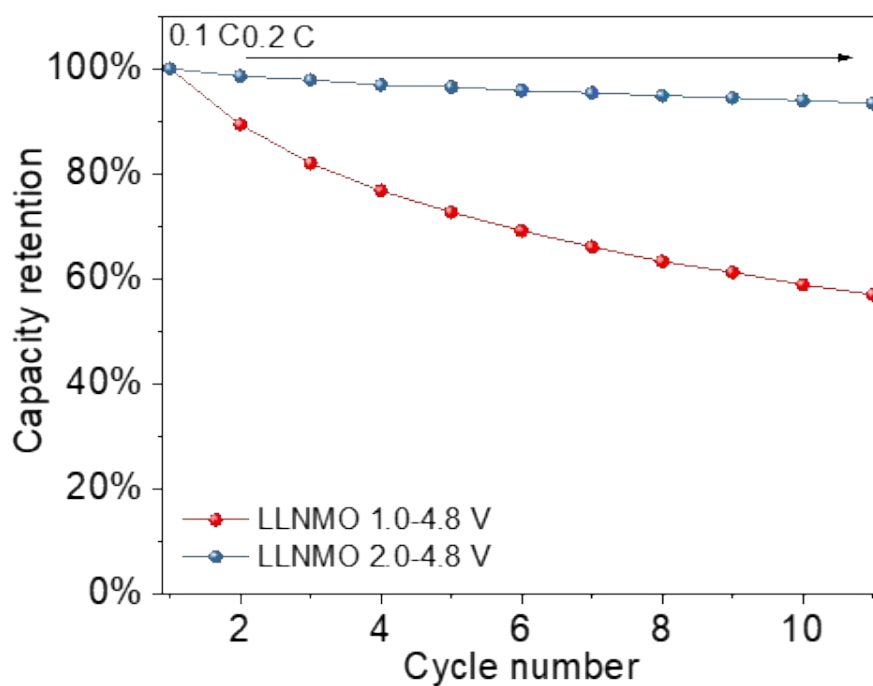

**Figure S3.** Capacity retention of LLNMO cathode within the voltage ranges of 2.0-4.8 V and 1.0-4.8 V, respectively.

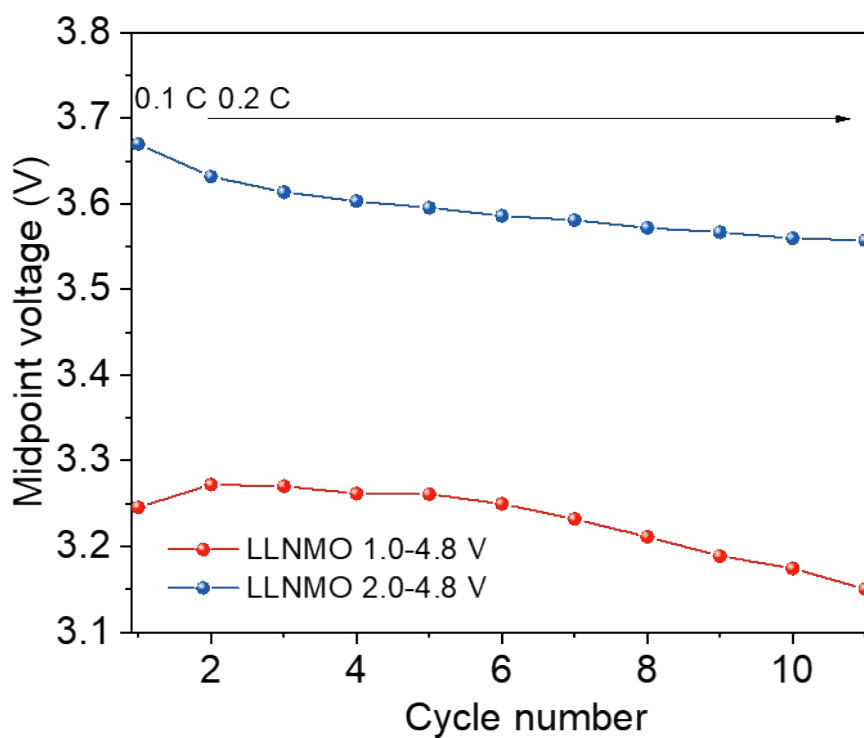

**Figure S4.** Voltage stability of LLNMO cathode within the voltage ranges of 2.0-4.8 V and 1.0-4.8 V, respectively.

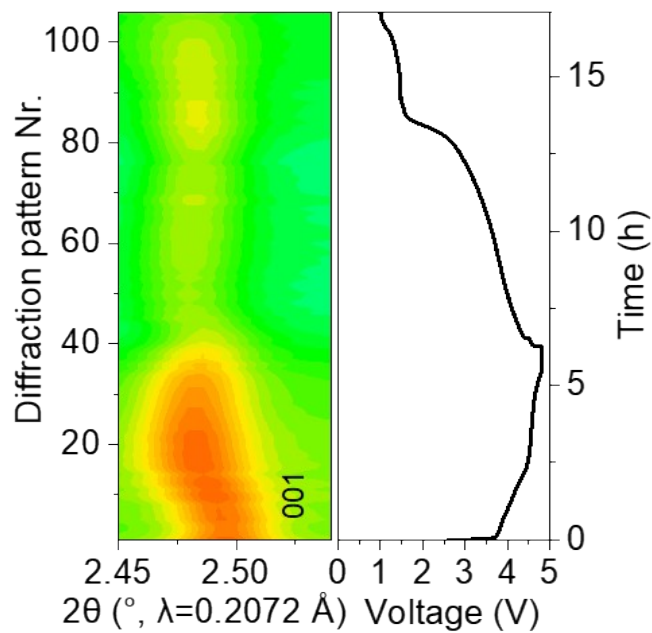

**Figure S5.** *In situ* sXRD patterns of LLNMO cathode at 0.1 C within a voltage range from 1.0 to 4.8 V.

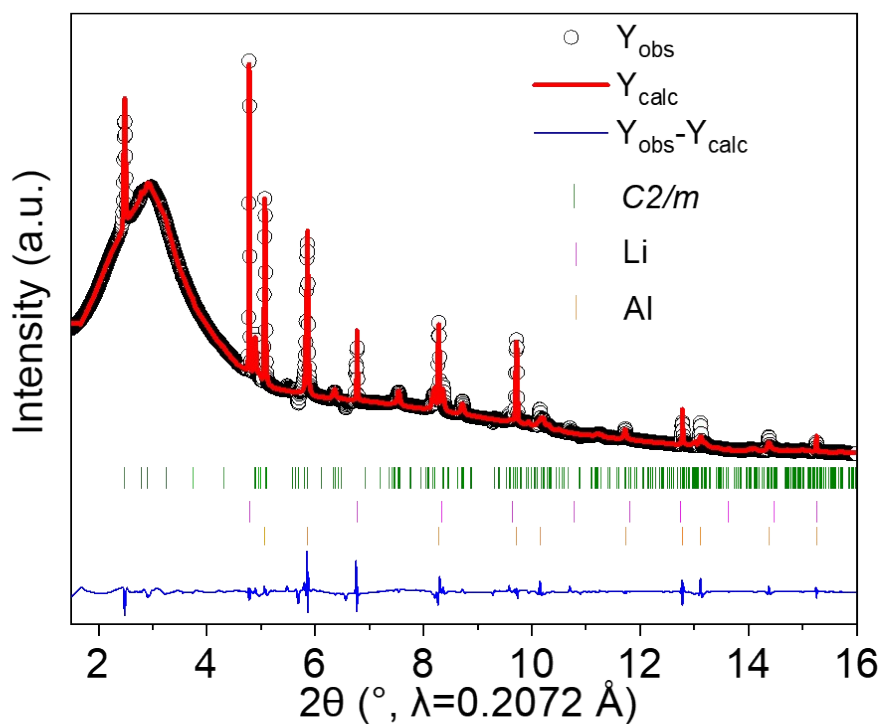

**Figure S6.** Rietveld refinement against sXRD pattern of LLNMO cathode charged to 4.5 V.

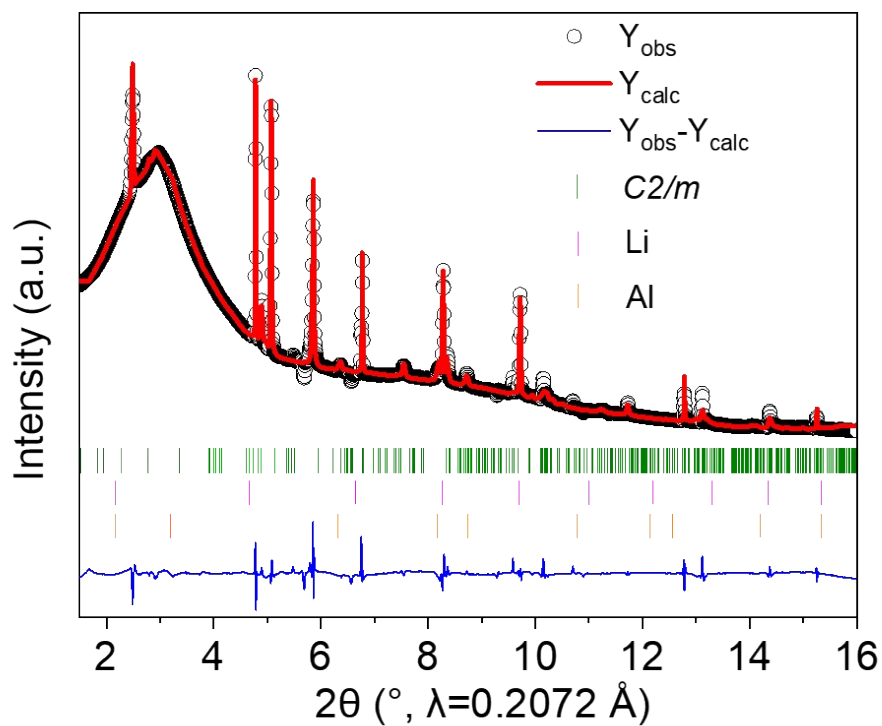

**Figure S7.** Rietveld refinement against sXRD pattern of LLNMO cathode charged to 4.8 V.

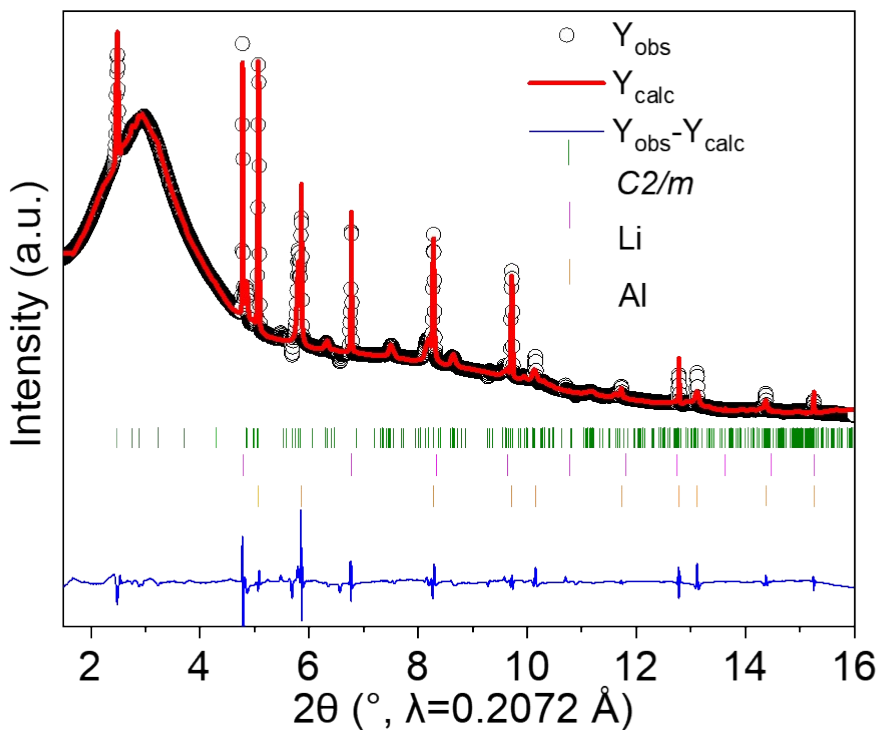

**Figure S8.** Rietveld refinement against sXRD pattern of LLNMO cathode discharged to 1.5 V.

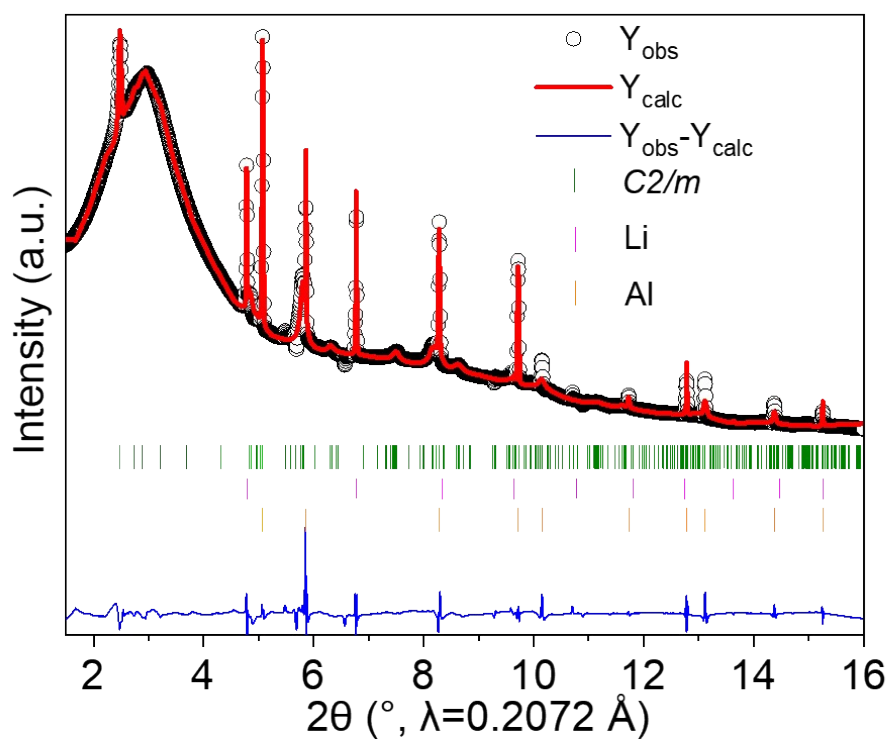

**Figure S9.** Rietveld refinement against sXRD pattern of LLNMO cathode discharged to 1.0 V.

**Table S1.** Element content of LLNMO sample.

| Sample | Molar ratio |      |      |
|--------|-------------|------|------|
|        | Li          | Ni   | Mn   |
| LLNMO  | 1.18        | 0.21 | 0.61 |

**Table S2.** Crystallographic parameters of LLNMO.

| Cell parameters                                                                                                                              |      |       |        |       |       |
|----------------------------------------------------------------------------------------------------------------------------------------------|------|-------|--------|-------|-------|
| Space group: $C2/m$ , $a = 4.9611$ (2) Å, $b = 8.5948$ (3) Å, $c = 5.0318$ (5) Å, $V = 202.9234$ (7) Å <sup>3</sup> , $\beta = 108.952$ (5)° |      |       |        |       |       |
| Atomic positions                                                                                                                             |      |       |        |       |       |
| Name                                                                                                                                         | site | x     | y      | z     | Fract |
| Li1                                                                                                                                          | 2c   | 0.000 | 0.000  | 0.500 | 1.000 |
| Li2                                                                                                                                          | 4h   | 0.000 | 0.695  | 0.500 | 0.957 |
| Ni2                                                                                                                                          | 4h   | 0.000 | 0.695  | 0.500 | 0.043 |
| Ni1                                                                                                                                          | 2b   | 0.000 | 0.500  | 0.000 | 0.202 |
| Li3                                                                                                                                          | 2b   | 0.000 | 0.500  | 0.000 | 0.410 |
| Mn2                                                                                                                                          | 2b   | 0.000 | 0.500  | 0.000 | 0.396 |
| Mn1                                                                                                                                          | 4g   | 0.000 | 0.1743 | 0.000 | 0.705 |
| Ni3                                                                                                                                          | 4g   | 0.000 | 0.173  | 0.000 | 0.155 |
| Li4                                                                                                                                          | 4g   | 0.000 | 0.173  | 0.000 | 0.149 |
| O1                                                                                                                                           | 4i   | 0.216 | 0.000  | 0.223 | 1.000 |
| O2                                                                                                                                           | 8j   | 0.250 | 0.332  | 0.228 | 1.000 |
| Refinement parameters                                                                                                                        |      |       |        |       |       |
| $R_{wp} = 1.12$ %, $R_p = 2.06$ %, $\chi^2$ : 3.33                                                                                           |      |       |        |       |       |
